# Supplementary material for: Associations between nutritional and immune status and clinicopathologic factors in patients with tuberculosis: A comprehensive analysis
Source: Front Cell Infect Microbiol. 2022 Nov 24;12:1013751. doi: 10.3389/fcimb.2022.1013751 (PMC9731357; doi:10.3389/fcimb.2022.1013751)
Supplement: Supplementary Table 1 — The patient general clinical characteristics. BMI, body mass index; NRS 2002, Nutritional Risk Score 2002. [file Table_1.xlsx]

## Sheet: Sheet1
Table S1. The patient general clinical characteristics.
Feature	Value
Demographic characteristics
Age (years)	45.30±19.13(18-85)
＜ 65 years	75（80.65%）
≥65 years	18（19.35%）
Male/Female	44(47.31%)/49（52.69%）
Weight loss %
Stable	55（59.14%）
Weight loss ≤ 10%	29（31.18%）
Weight loss > 10%	9（9.68%）
Weight [kg]	54.78 ±10.54
Weight loss [kg]	1.95 ±3.11(0-15)
BMI (kg/m2)	20.57 ±3.24 (12.65-29.14)
BMI groups according to WHO classification
< 18.5	27(29.03%)
18.5-24.9	56(60.22%)
25-29.9	10(10.75%)
≥ 30	0(0.00%)
BMI general division
< 18.5	27(29.03%)
≥ 18.5	66(70.97%)
NRS 2002 (points)
NRS 2002 classification
0	0(0.00%)
1	23(24.73%)
2	9（9.68%）
3	21(22.58%)
4	35(37.63%)
5	5(5.38%)
NRS 2002 groups
< 3 points	32(34.41%)
≥ 3 points	61(65.59%)
Diabetes mellitus (type 1)
No	92(98.92%)
Yes	1(1.08%)
Diabetes mellitus (type 2)
No	85(91.40%)
Yes	9（9.68%）
Arterial hypertension
No	81(77.10%)
Yes	12(12.90%)
Smoking
No	72(77.42%)
Yes	21(22.58%)
Smoking cessation
No	5(5.38%)
Yes	16(17.20%)
Not applicable	72(77.42%)
Duration of smoking (years)	21.67 ±11.78(1-40)
Number of cigarettes per day	21.67 ±12.62(2-60)
Alcohol consumption
No	81(87.10%)
Yes	12(12.90%)
HIV
No	92(98.92%)
Yes	1(1.08%)
Clinical manifestation
Cough	52(55.91%)
Sputum production	45(48.39%)
Hemoptysis	6(6.45%)
Chest pain	15(16.13%)
Shortness of breath	23(24.73%)
Fever	41(44.09%)
Night sweats	18（19.35%）
Weakness	25(26.88%)
Loss of appetite	41(44.09%)
Diarrhea	4(4.30%)
Vomitus	4(4.30%)
Abdominal distension	10(10.75%)
Constipation	4(4.30%)
Duration of clinical symptoms [months]	9.60 ±15.56(0.1-72)
Duration of weight loss [months]	5.48±11.70(0.25-72)
BMI, body mass index; NRS 2002, Nutritional Risk Score 2002.
